# Supplementary material for: c-Myb Enhances Breast Cancer Invasion and Metastasis through the Wnt/β-Catenin/Axin2 Pathway
Source: Oxford University Press journal article supplement (doi:10.1158/0008-5472.can-15-2302), 2016-04-06
Supplement: 00085472can152302-sup-154440_2_supp_3390929_n3n8ng.docx [file 00085472can152302-sup-154440_2_supp_3390929_n3n8ng.docx]

**Supplementary Table**

**Table 1:** **Information of grading breast cancer tissue microarray**

|  | Total | | c-Myb | | | | | AXIN2 | | | | |
| --- | --- | --- | --- | --- | --- | --- | --- | --- | --- | --- | --- | --- |
| Low expression | | High expression | |  | Low expression | | High expression | |  |
| N | % | N | % | N | % | p-value | N | % | N | % | p-value |
| Age (years)  <40  40-50  50-60  >=60 | 17  46  49  64 | 9.7  26.1  27.8  36.4 | 4  16  18  25 | 6.3  25.4  28.6  39.7 | 13  30  31  39 | 11.5  26.5  27.4  34.5 | 0.694 | 3  10  6  13 | 9.4  31.2  18.8  40.6 | 14  36  43  51 | 9.7  25.0  29.9  35.4 | 0.626 |
| Histological type  Ductal  Lobular  Other | 130  18  28 | 73.9  10.2  15.9 | 50  4  6 | 83.3  6.7  10.0 | 80  14  11 | 76.2  13.3  10.5 | 0.404 | 25  6  0 | 80.6  19.4  0 | 105  12  17 | 78.4  9.0  12.7 | 0.040 |
| T-stage  T1  T2  T3/4 | 100  63  11 | 57.5  36.2  6.3 | 31  28  4 | 49.2  44.4  6.3 | 69  35  7 | 62.2  31.5  6.3 | 0.220 | 19  10  3 | 59.4  31.2  9.4 | 81  53  8 | 57.0  37.3  5.6 | 0.648 |
| N-stage  N0  N1-3 | 106  62 | 63.1  36.9 | 45  17 | 72.6  27.4 | 61  45 | 57.5  42.5 | 0.051 | 19  12 | 61.3  38.7 | 87  50 | 63.5  36.6 | 0.818 |
| ER  Negative  Positive | 39  110 | 26.2  73.8 | 18  37 | 32.7  67.3 | 21  73 | 22.3  77.7 | 0.164 | 5  23 | 17.9  82.1 | 34  87 | 28.1  71.9 | 0.267 |
| PR  Negative  Positive | 57  91 | 38.5  61.5 | 26  28 | 48.1  51.9 | 31  63 | 33.0  67.0 | 0.068 | 9  19 | 32.1  67.9 | 48  72 | 40.0  60.0 | 0.442 |
| Her2  Negative  Positive | 55  12 | 82.1  17.9 | 16  5 | 76.2  23.8 | 39  7 | 84.8  15.2 | 0.395 | 9  2 | 81.8  18.2 | 46  10 | 82.1  17.9 | 0.980 |
